# Supplementary material for: Removal of Congo Red by Silver Carp (Hypophthalmichthys molitrix) Fish Bone Powder: Kinetics, Equilibrium, and Thermodynamic Study
Source: Hindawi journal article supplement (doi:10.1155/2021/9535644), 2021-09-06
Supplement: f1 [file 9535644.f1.zip]

Archive with 3 entries (3 files):
- 9535644.f1/Supplemental file 1 (Fig. S1).docx
- 9535644.f1/Supplemental file 2 (Fig. S2).docx
- 9535644.f1/SUPPLEMENTARY DESCRIPTION.docx
