# Supplementary material for: Removal of Congo Red by Silver Carp (Hypophthalmichthys molitrix) Fish Bone Powder: Kinetics, Equilibrium, and Thermodynamic Study
Source: Hindawi journal article supplement (doi:10.1155/2021/9535644), 2021-09-06
Supplement: f1 [file 9535644.f1.zip › 9535644.f1/Supplemental file 2 (Fig. S2).docx]

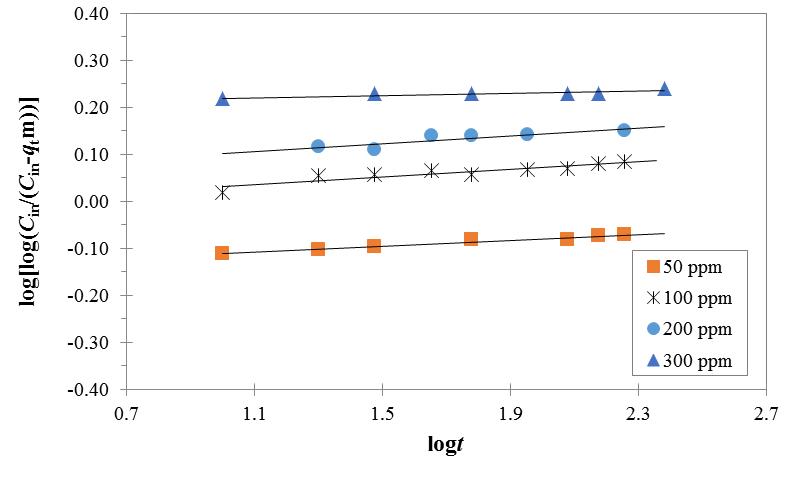


Supplemental Fig. S2: Bangham’s diffusion model for congo red adsorption by Fish bone powder adsorbent.
